# Supplementary material for: Conceptualizing flexible papers using cellulose model surfaces and polymer particles
Source: Royal Society of Chemistry journal article supplement (doi:10.1039/d3sm01461d), 2024-01-01
Supplement: d3sm01461d1.pdf [file d3sm01461d1.pdf]

# Supporting Information: Conceptualizing flexible papers using cellulose model surfaces and polymer particles

Cassia Lux,<sup>†</sup> Sabrina Kerz,<sup>†</sup> Catarina C. Ribeiro,<sup>‡</sup> Jennifer Bareuther,<sup>¶</sup> Johannes  
Lützenkirchen,<sup>§</sup> Sebastian Stock,<sup>†</sup> Michalis Tsintsaris,<sup>†</sup> Matthias Rehahn,<sup>¶</sup> Robert  
W. Stark,<sup>‡</sup> and Regine von Klitzing<sup>\*,†</sup>

<sup>†</sup>*Soft Matter at Interfaces, Department of Physics, 64289 Darmstadt, Germany*

<sup>‡</sup>*Physics of Surfaces, Department of Material Science, 64287 Darmstadt, Germany*

<sup>¶</sup>*Macromolecular Chemistry: Chemistry of Polymers, Department of Chemistry, 64287  
Darmstadt, Germany*

<sup>§</sup>*Institute for Nuclear Disposal, Karlsruhe Institute of Technology, 76021 Karlsruhe, Germany*

E-mail: [klitzing@smi.tu-darmstadt.de](mailto:klitzing@smi.tu-darmstadt.de)

Phone: +49(0)6151-16-24506

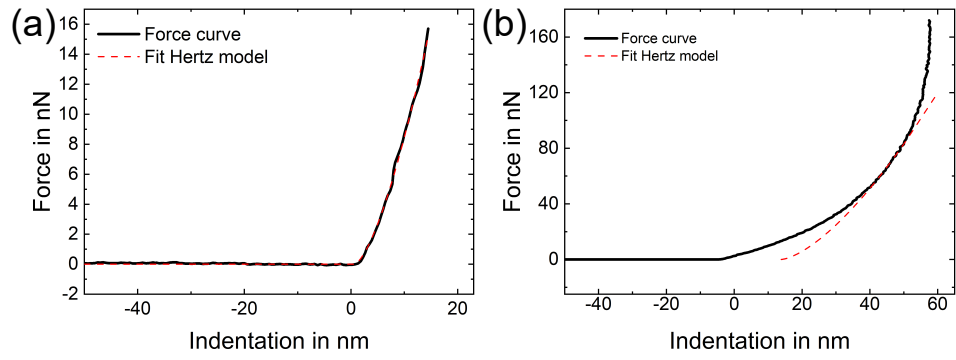

Figure S1: Exemplary force curves and fitting at (a) low indentations and (b) high indentation using an offset in the Hertz model.

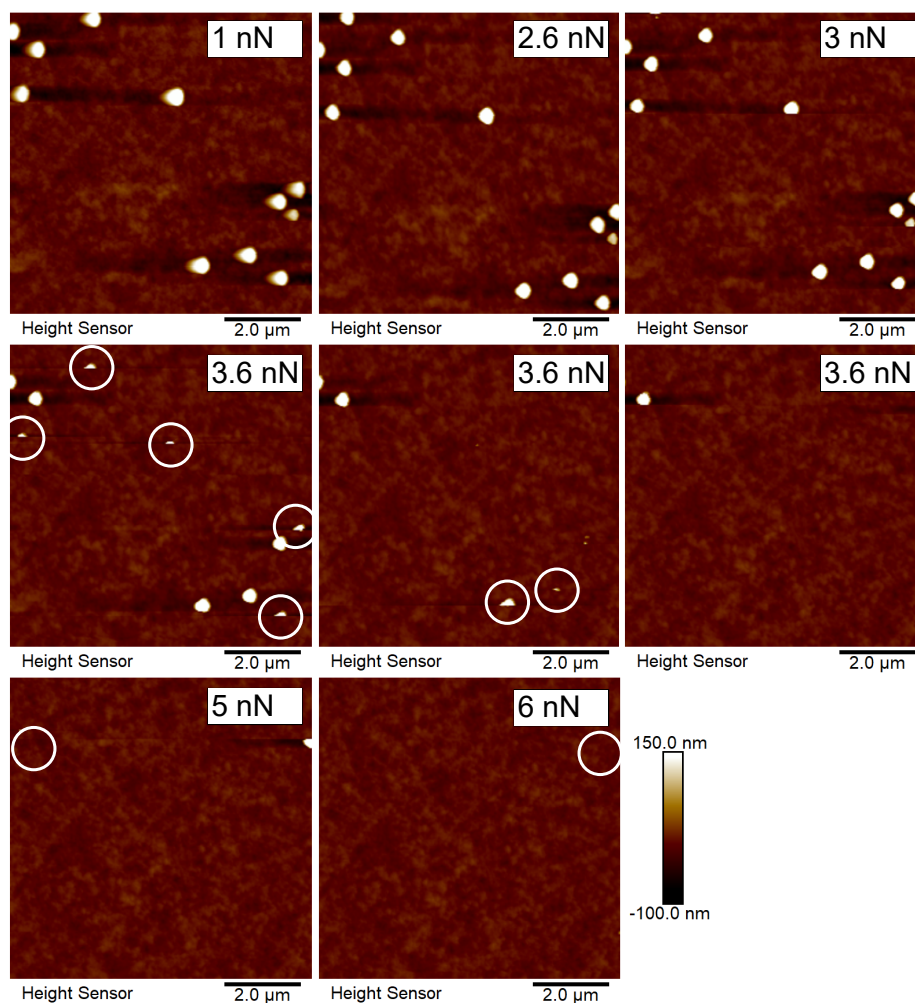

Figure S2: Exemplary results of the pushing particles measurement for the CSP on CMS at pH 3. All images have a size of  $8 \times 8 \mu\text{m}$  and a height scale of 250 nm. The movement of the particles is monitored and shown here with the white markers.

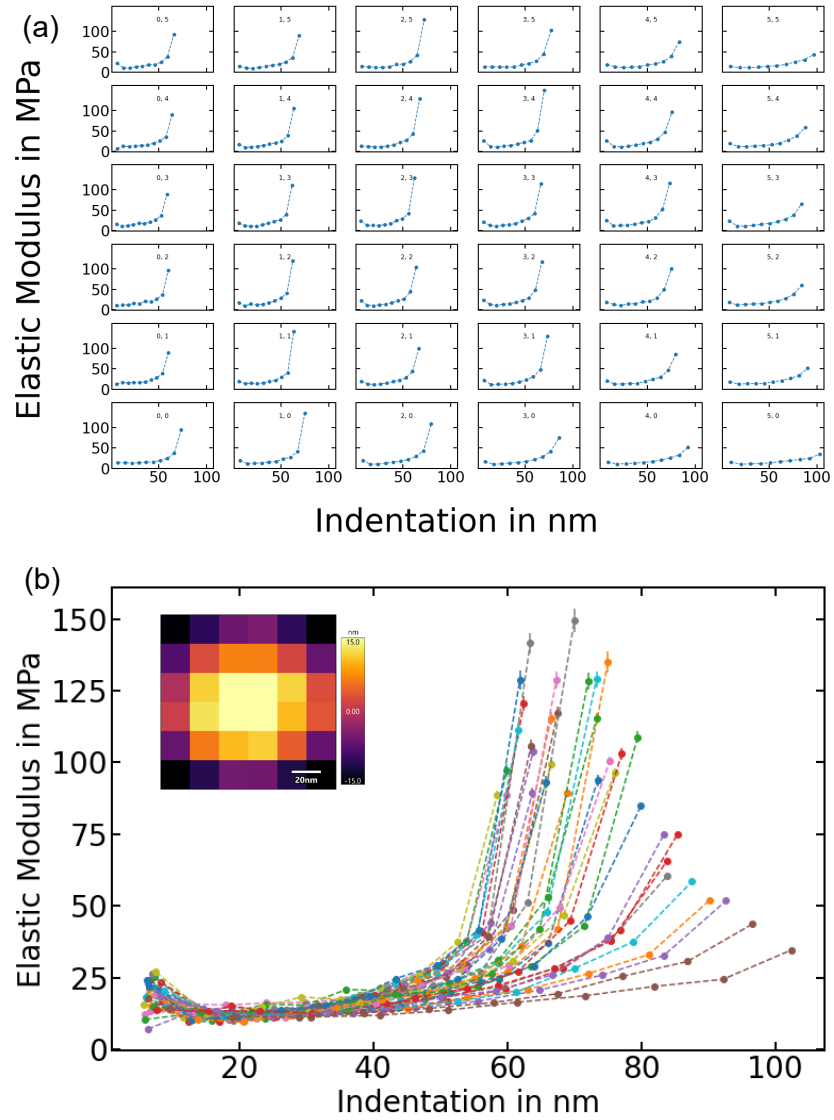

Figure S3: Indentation measurements of the CSP at varying indentation depth. (a) shows the  $E$  modulus in dependence of the indentation depth for specific position measured at the center of the particle. The graphs are ordered to match the height map shown in (b) which has a size of 100 x 100 nm. (b) also shows all the  $E$  moduli curves superimposed for easier comparison.

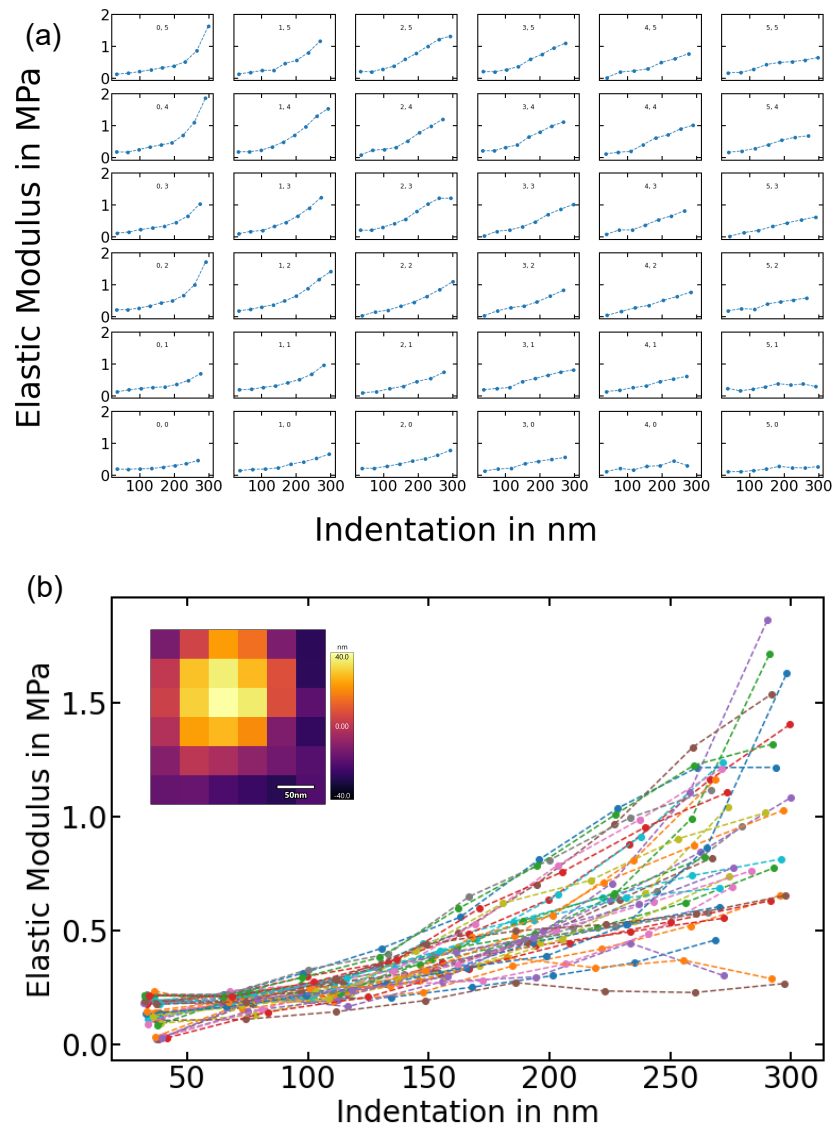

Figure S4: Indentation measurements of the MG at varying indentation depth. (a) shows the  $E$  modulus in dependence of the indentation depth for specific position measured at the center of the particle. The graphs are ordered to match the height map shown in (b) which has a size of 200 x 200 nm. (b) also shows all the  $E$  moduli curves superimposed for easier comparison.
